# Supplementary material for: StHsfB5 Promotes Heat Resistance by Directly Regulating the Expression of Hsp Genes in Potato
Source: MDPI journal article supplement (doi:10.3390/ijms242216528), 2023-11-20
Supplement: s1 [file s1]

Table S1. Primers used in the manuscript.

| Primer name     | Sequences                                                                 | purpose                                                    |
|-----------------|---------------------------------------------------------------------------|------------------------------------------------------------|
| StHsfB5-OE-F    | 5'GG <u>ACTAGT</u> ATGGCCACAGATAATCGGAAT3'                                | Constructing overexpression plasmid HsfB5-pCAMBIA1305      |
| StHsfB5-OE-R    | 5'CGGGATCCAAACAACCTTCTAGTTTTATTATGT3'                                     |                                                            |
| StHsfB5-SRDX-F  | 5'GGACTAGTATGGCCACAGATAATCGGAAT3'                                         | Constructing overexpression plasmid HsfB5-SRDX-pCAMBIA1305 |
| StHsfB5-SRDX-R  | 5'CGGGATCCagcgaaacccaaacggagtctagatcgagatctaa AAACAACCTTCTAGTTTTATTATGT3' |                                                            |
| StHsfB5-IF      | 5'ATGACGCACAATCCCACTAT3'                                                  | PCR identification for StHsfB5-pCAMBIA1305 lines           |
| StHsfB5-IR      | 5'TAGGAAATACACTTGGCTCACA3'                                                |                                                            |
| StHsfB5-qRT-F   | 5'GAAAAGTTCCAGAAAGGGTGC3'                                                 | qRT-PCR                                                    |
| StHsfB5-qRT-R   | 5'CCATGAGAAGTTGCCTTGTTGTA3'                                               |                                                            |
| EF1 $\alpha$ -F | 5'CTGTTAAGGATCTGAAGCGTGGT3'                                               | qRT-PCR                                                    |
| EF1 $\alpha$ -R | 5'AATGTGGGAAGTGTGGCAGTCG3'                                                |                                                            |
| sHsp17.6-F      | 5' AGCGGAGAGAGGAATGTGGAGAAAG3'                                            | qRT-PCR                                                    |
| sHsp17.6-R      | 5'CAGGCTTCTTCACTTGTTCCCTTTGG3'                                            |                                                            |
| sHsp21-F        | 5'CTTGCTTTTAATGGAGGTTGGGTTG3'                                             | qRT-PCR                                                    |
| sHsp21-R        | 5' TCCTCTTTTCCATTATTCTTGACCC3'                                            |                                                            |
| sHsp22.7-F      | 5' TGGCCTTATTAGCTCGTTCAGATTG3'                                            | qRT-PCR                                                    |
| sHsp22.7-R      | 5'CTCTCAACTCTATGCCATTTCTCACC3'                                            |                                                            |
| Hsp80-F         | 5'TCGTCGTTTCAGACCGTGTTGTG3'                                               | qRT-PCR                                                    |
| Hsp80-R         | 5'GTCATTCTTGCTGCATCAGCCCTC3'                                              |                                                            |
| StHsfB5-ADF     | 5'GGCCATGGAGGCCATGGCCACAGATAATCGGAAT3'                                    | Constructing HsfB5-pGADT7                                  |
| StHsfB5-ADR     | 5'CCCCCGGG CTAAACAACCTTCTAGT3'                                            |                                                            |
| sHsp21-HSE-F    | 5'AGCTTCCTTCTACCAATATCCTAGAACTTTCTGGGTAC3'                                | Constructing pro-sHsp21-pABAi                              |
| sHsp21-HSE-R    | 5'C CAGAAAGTTCTAGGATATTGGTAGAAGGA3'                                       |                                                            |

|                |                                                           |                                           |
|----------------|-----------------------------------------------------------|-------------------------------------------|
| sHsp22.7-HSE-F | 5'AGCTTACTTCATTCTGAAAATTGTACAATTCTAATATTTCTAGGTAC3'       | Constructing<br>pro-sHsp22.7-pABAi        |
| sHsp22.7-HSE-R | 5'CTAGAAATATTAGAATTGTACAATTTTCAGAATGAAGTA3'               |                                           |
| Hsp80-HSE-F    | 5'AGCTTATTTCTGAAAATCAATAGAAAGAACAAGGCAGAAGAAAA<br>GGTAC3' | Constructing<br>pro-Hsp80-pABAi           |
| Hsp80-HSE-R    | 5'CTTTTCTTCTGCCTTGTGTTCTTTCTATTGATTTTCAGAAATA3'           |                                           |
| sHsp17.6-HSE-F | 5'AGCTTGAGTGAAGAAGCTTCAAGGAGAGAAAAAAGGTAC3'               | Constructing<br>pro-sHsp17.6-pABAi        |
| sHsp17.6-HSE-R | 5'CTTTTTTCTCTCCTTGAAGCTTCTTCACTCA3'                       |                                           |
| sHsp21LUC-F    | 5'GGGGTACCATCAACATTCTTTTTTTTTTCTC3'                       | Constructing<br>pro-sHsp21-pGreenII0800   |
| Hsp21LUC-R     | 5'ACGCGTCGACTTTATAATTATTTGATAAATGAAG3'                    |                                           |
| Hsp80LUC-F     | 5'GGGGTACCCCTTAGGTAGAGGGACAGTTTATC3'                      | Constructing<br>pro-Hsp80-pGreenII0800    |
| sHsp80LUC-R    | 5'ACGCGTCGACTACAGATCTGCGATGCTGC3'                         |                                           |
| sHsp22.7LUC-F  | 5'GGGGTACCGTAATAAGCTTTCGTAATACATAG3'                      | Constructing<br>pro-sHsp22.7-pGreenII0800 |
| sHsp22.7LUC-R  | 5'ACGCGTCGACTTTTTTTTTTTCCTGATTGATG3'                      |                                           |
| sHsp17.6LUC-F  | 5'GGGGTACCAGATAAGCAAGTTGCAAAGTC3'                         | Constructing<br>pro-sHsp17.6-pGreenII0800 |
| sHsp17.6LUC-R  | 5'ACGCGTCGACTTTCAGTGAGCTTTTGAAAAAC3'                      |                                           |
